# Supplementary material for: Cell Cycle-Dependent Flagellar Disassembly in a Firebug Trypanosomatid Leptomonas pyrrhocoris
Source: PubMed Central journal article supplement (PMC6879719; doi:10.1128/mbio.02424-19), 2019-11-26

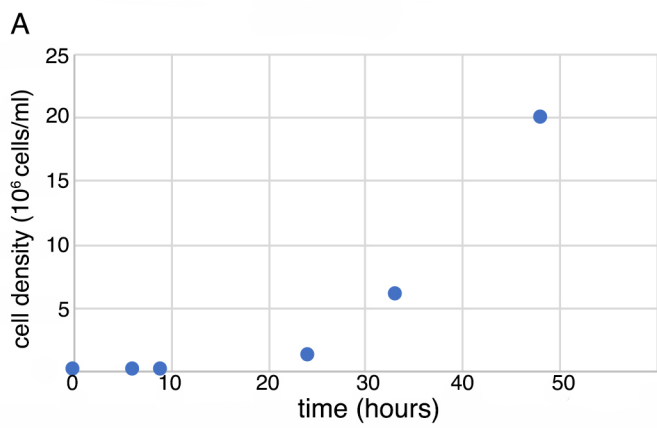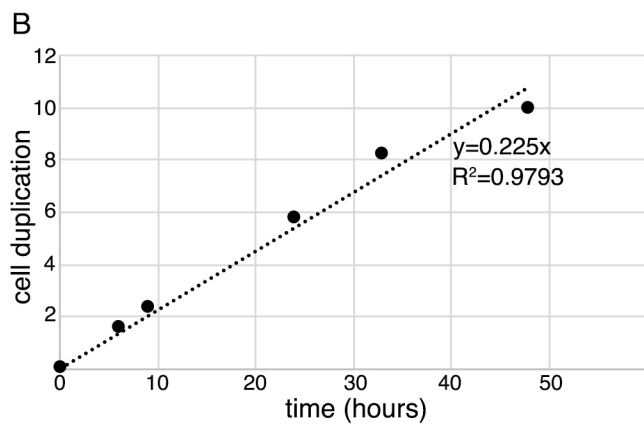

Supplement: mBio.02424-19-sf001.pdf [file mBio.02424-19-sf001.pdf]
